# Supplementary material for: COVID-19 Vaccine Status, Intent, Hesitancy, and Disease-Related Beliefs in People with Multiple Sclerosis
Source: MDPI journal article supplement (doi:10.3390/vaccines11020410), 2023-02-10
Supplement: s1 [file s1]

## **Supplementary materials**

These are supplementary materials to:

**COVID-19 vaccine status, intent, hesitancy, and disease-related beliefs in people with multiple sclerosis.**

**Multiple Sclerosis patients' perspectives on coronavirus VACCination Survey (MSVACCS) investigators:**

*Monash Health, Victoria:* Ms. Michelle Allan, Dr. Nathan Bain, Prof. Ernest Butler, Dr. Daphne Day, Dr. Lisa Grech, Dr. Amelia McCartney, Dr. Mike Nguyen, Prof. Eva Segelov, Dr. Kate Webber.

*Sunshine Coast Hospital and Health Service, Queensland:* Dr. Joshua Barton, Dr. Antony Winkel.

**Table S1.** Survey items

| <b>Screening items</b>                                                                                                                                                                                                                        |                                                                                                                                                                                                                   |
|-----------------------------------------------------------------------------------------------------------------------------------------------------------------------------------------------------------------------------------------------|-------------------------------------------------------------------------------------------------------------------------------------------------------------------------------------------------------------------|
| Are you 18 years or older?                                                                                                                                                                                                                    | Yes<br>No (Terminate if No)                                                                                                                                                                                       |
| Have you got MS?                                                                                                                                                                                                                              | Yes<br>No (Terminate if No)                                                                                                                                                                                       |
| Are you a [participating site] patient?                                                                                                                                                                                                       | Yes<br>No (Terminate if No)                                                                                                                                                                                       |
| <b>Vaccination status</b>                                                                                                                                                                                                                     |                                                                                                                                                                                                                   |
| Have you already received a COVID-19 vaccine?                                                                                                                                                                                                 | Yes, 1 dose only<br>Yes, 2 doses<br>No                                                                                                                                                                            |
| <b>Oxford COVID-19 Vaccine Hesitancy Scale</b>                                                                                                                                                                                                |                                                                                                                                                                                                                   |
| Instructions: We would like to know your feelings and thoughts about the COVID-19 vaccine. Note: If you have already been vaccinated against COVID-19, please complete these questions in relation to a future COVID-19 vaccine dose/booster. |                                                                                                                                                                                                                   |
| Would you take a COVID-19 vaccine if offered?                                                                                                                                                                                                 | Definitely/have taken<br>Probably<br>I may or may not<br>Probably not<br>Definitely not<br>Don't know                                                                                                             |
| When a COVID-19 vaccine is available:                                                                                                                                                                                                         | I will want to get it as soon as possible<br>I will take it when offered<br>I'm not sure what I will do<br>I will put off (delay) getting it<br>I will refuse to get it<br>Don't know                             |
| I would describe my attitude towards receiving a COVID-19 vaccine as:                                                                                                                                                                         | Very keen<br>Pretty positive<br>Neutral<br>Quite uneasy<br>Against it<br>Don't know                                                                                                                               |
| If a COVID-19 vaccine was available in my local area, I would:                                                                                                                                                                                | Get it as soon as possible<br>Get it when I have time<br>Delay getting it<br>Avoid getting it for as long as possible<br>Never get it<br>Don't know                                                               |
| If my family or friends were thinking of getting a COVID-19 vaccination, I would:                                                                                                                                                             | Strongly encourage them<br>Encourage them<br>Not say anything to them about it<br>Ask them to delay getting the vaccination<br>Suggest that they do not get the vaccination<br>Don't know                         |
| I would describe myself as:                                                                                                                                                                                                                   | Eager to get a COVID-19 vaccine<br>Willing to get the COVID-19 vaccine<br>Not bothered about getting the COVID-19 vaccine<br>Unwilling to get the COVID-19 vaccine<br>Anti-vaccination for COVID-19<br>Don't know |
| Taking a COVID-19 vaccination is:                                                                                                                                                                                                             | Really important<br>Important<br>Neither important nor unimportant<br>Unimportant<br>Really unimportant<br>Don't know                                                                                             |
| <b>Oxford COVID-19 Vaccine Confidence and Complacency Scale</b>                                                                                                                                                                               |                                                                                                                                                                                                                   |
| Do you think you will be infected with COVID-19 over the next 12 months?                                                                                                                                                                      | Definitely<br>Probably<br>Possibly<br>Probably not<br>Definitely not<br>Don't know                                                                                                                                |

|                                                                              |                                                                                                                                                                                                                                                       |
|------------------------------------------------------------------------------|-------------------------------------------------------------------------------------------------------------------------------------------------------------------------------------------------------------------------------------------------------|
| I think the COVID-19 vaccine is likely to:                                   | Work for almost everyone<br>Work for most people<br>I am unsure how many people it will work for<br>Not work for most people<br>Not work for anyone<br>Don't know                                                                                     |
| I think the COVID-19 vaccine is likely to:                                   | Definitely work for me<br>Probably work for me<br>May or may not work for me<br>Probably not work for me<br>Definitely not work for me<br>Don't know                                                                                                  |
| I think if I get the COVID-19 vaccine it will be:                            | Really helpful for the community around me<br>Helpful for the community around me<br>Neither helpful nor unhelpful for the community around me<br>Unhelpful for the community around me<br>Really unhelpful for the community around me<br>Don't know |
| I think if individuals like me get the COVID-19 vaccine it will:             | Save a large number of lives<br>Save some lives<br>Have no impact<br>Lead to more deaths<br>Lead to a large number of deaths<br>Don't know                                                                                                            |
| I think the speed of developing and testing the vaccine means it will be:    | Really good<br>Good<br>Will not affect how good or bad it is<br>Bad<br>Really bad<br>Don't know                                                                                                                                                       |
| I think the speed of developing and testing the vaccine means it will be:    | Really safe<br>Safe<br>It will not affect how safe it is<br>Unsafe<br>Really unsafe<br>Don't know                                                                                                                                                     |
| I think if many people do not get the vaccine this:                          | Will be dangerous<br>May be dangerous<br>Will have no consequences at all<br>May be good<br>Will be good<br>Don't know                                                                                                                                |
| I expect that receiving the vaccine will be:                                 | Hardly noticeable<br>A little unpleasant<br>Moderately unpleasant<br>Painful<br>Extremely painful<br>Don't know                                                                                                                                       |
| I think the side-effects for people of getting the COVID-19 vaccine will be: | None<br>Mild<br>Moderate<br>Significant<br>Life-threatening<br>Don't know                                                                                                                                                                             |
| I think the COVID-19 vaccine will:                                           | Greatly strengthen my immune system<br>Strengthen my immune system<br>It will neither strengthen nor weaken my immune system<br>Weaken my immune system<br>Greatly weaken my immune system<br>Don't know                                              |
| I think taking the COVID-19 vaccine:                                         | Will give me complete freedom to get on with life just as before<br>Will give me greater freedom<br>Will have no effect on my freedom<br>Will restrict my freedom<br>Will completely restrict my freedom to get on with life                          |

|                                                                                                                                                                                                                                                                                                                                                                                        |                                                                                                                                                           |
|----------------------------------------------------------------------------------------------------------------------------------------------------------------------------------------------------------------------------------------------------------------------------------------------------------------------------------------------------------------------------------------|-----------------------------------------------------------------------------------------------------------------------------------------------------------|
|                                                                                                                                                                                                                                                                                                                                                                                        | Don't know                                                                                                                                                |
| I think getting the vaccine is a sign of:                                                                                                                                                                                                                                                                                                                                              | Great personal strength<br>Personal strength<br>Not a sign of personal strength or weakness<br>Personal weakness<br>Great personal weakness<br>Don't know |
| Taking a new COVID-19 vaccine will make me feel like a guinea pig:                                                                                                                                                                                                                                                                                                                     | Do not agree<br>Agree a little<br>Agree moderately<br>Agree a lot<br>Completely agree<br>Don't know                                                       |
| <b>Disease Influenced Vaccine Acceptance Scale-Six</b><br>Instructions: We would like to know about how your MS may be related to your feelings and thoughts about the COVID-19 vaccine. For each of the following statements, please tap/click the one choice that best represents how strongly you agree or disagree with it. There are 6 choices to choose from for each statement. |                                                                                                                                                           |
| My history of MS makes me more worried about being infected with COVID-19:                                                                                                                                                                                                                                                                                                             | Strongly agree<br>Somewhat agree<br>Neither disagree nor agree<br>Somewhat disagree<br>Strongly disagree<br>Don't know                                    |
| My history of MS means having the vaccine is more important to me:                                                                                                                                                                                                                                                                                                                     | Strongly agree<br>Somewhat agree<br>Neither disagree nor agree<br>Somewhat disagree<br>Strongly disagree<br>Don't know                                    |
| My doctor's recommendation regarding the vaccine is important to me:                                                                                                                                                                                                                                                                                                                   | Strongly agree<br>Somewhat agree<br>Neither disagree nor agree<br>Somewhat disagree<br>Strongly disagree<br>Don't know                                    |
| My history of MS makes me worried about how well the vaccine will work for me:                                                                                                                                                                                                                                                                                                         | Strongly disagree<br>Somewhat disagree<br>Neither disagree nor agree<br>Somewhat agree<br>Strongly agree<br>Don't know                                    |
| My history of MS makes me worried about how the vaccine will affect me:                                                                                                                                                                                                                                                                                                                | Strongly disagree<br>Somewhat disagree<br>Neither disagree nor agree<br>Somewhat agree<br>Strongly agree<br>Don't know                                    |
| I am worried about how the vaccine will affect my MS treatment:                                                                                                                                                                                                                                                                                                                        | Strongly disagree<br>Somewhat disagree<br>Neither disagree nor agree<br>Somewhat agree<br>Strongly agree<br>Don't know                                    |
| <b>Clinical</b>                                                                                                                                                                                                                                                                                                                                                                        |                                                                                                                                                           |
| What type of MS do you have?                                                                                                                                                                                                                                                                                                                                                           | Relapsing-remitting MS (RRMS)<br>Primary progressive MS (PPMS)<br>Secondary progressive MS (SPMS)<br>Other (please specify):<br>_____<br>Don't know       |
| How long have you had MS?                                                                                                                                                                                                                                                                                                                                                              | Less than 1 year<br>1 to 5 years<br>5.1 to 10 years<br>More than 10 years                                                                                 |

|                                                                                                                                                                                          |                                                                                                                                                                       |
|------------------------------------------------------------------------------------------------------------------------------------------------------------------------------------------|-----------------------------------------------------------------------------------------------------------------------------------------------------------------------|
| My current treatment for my MS is/are (select all that apply):                                                                                                                           | Tablets<br>Injectables<br>Intravenous<br>No specific treatment<br>Other:                                                                                              |
| Over the past 6 months, is your MS well controlled?                                                                                                                                      | Yes<br>No<br>Don't know                                                                                                                                               |
| People often have difficulty taking their medications for one reason or another. How many times have you missed taking your disease modifying therapies (DMT) in the past month?         | All of the time<br>Most of the time<br>Some of the time<br>Occasionally<br>Never                                                                                      |
| In the last four weeks, how much did your MS affect your daily activities?                                                                                                               | All the time<br>Most of the time<br>Some of the time<br>Not very often<br>Not at all                                                                                  |
| <b>Socio-demographics</b>                                                                                                                                                                |                                                                                                                                                                       |
| What is your gender?                                                                                                                                                                     | Male<br>Female<br>Non-binary / third gender<br>Prefer not to say                                                                                                      |
| What is your age?                                                                                                                                                                        | [Text entry]: _____                                                                                                                                                   |
| What is your highest educational level (completed)?                                                                                                                                      | No formal education<br>Primary education<br>Secondary education<br>Vocational/trade qualification<br>University education or higher degree<br>Other (please specify): |
| What is your annual household income (including everyone who lives in your home)?                                                                                                        | Less than \$50,000<br>\$50,001 to \$100,000<br>\$100,001 to \$150,000<br>More than \$150,000<br>Prefer not to say                                                     |
| Do you identify as Aboriginal and/or Torres Strait Islander?                                                                                                                             | Yes<br>No<br>Prefer not to say                                                                                                                                        |
| Is English your first language?                                                                                                                                                          | Yes<br>No                                                                                                                                                             |
| Please include any comments about your feelings and thoughts about your MS and COVID-19 vaccination that you would like to share. If you have no comments to include, please type 'Nil'. | [Text entry]: _____                                                                                                                                                   |

**Table S2.** Hierarchical multivariable logistic regression analysis of vaccinated status (n = 281).

| Block and variable (reference)             | B (SE)       | OR (95% CI)         | p-value |
|--------------------------------------------|--------------|---------------------|---------|
| Block 1                                    |              |                     |         |
| <b>Time since study commencement</b>       | -0.02 (0.02) | 0.98 (0.95 – 1.01)  | 0.16    |
| Block 2                                    |              |                     |         |
| <b>Age</b>                                 | 0.05 (0.01)  | 1.06 (1.03 – 1.08)  | <0.001  |
| Block 3                                    |              |                     |         |
| <b>Time since diagnosis (&gt;10 years)</b> |              |                     |         |
| <1 year                                    | 1.16 (1.16)  | 3.18 (0.33 – 30.90) | 0.32    |
| 1 – 5 years                                | -0.58 (0.43) | 0.56 (0.24 – 1.30)  | 0.18    |
| 5.1 – 10 years                             | -0.38 (0.47) | 0.69 (0.28 – 1.71)  | 0.42    |

**Notes:** Variables entered at each block: Block 1, time since study commencement; Block 2, age; Block 3, time since diagnosis. Abbreviations: B(SE), unstandardized coefficient (standard error); OR (95% CI), odds ratio (95% confidence interval).

**Table S3.** The relationship between vaccinated status with intent to get vaccinated, belief about contracting COVID-19 within the next 12 months, and the scale and subscale indices.

|                                                                                | MS - n, (%)                          |                          |                        |
|--------------------------------------------------------------------------------|--------------------------------------|--------------------------|------------------------|
|                                                                                | Vaccinated <sup>a</sup><br>(n = 233) | Unvaccinated<br>(n = 48) | OR (95% CI)            |
| <b>Intent to get vaccinated<sup>b</sup></b>                                    |                                      |                          |                        |
| Likely (reference)                                                             | 228 (91.6)                           | 21 (8.4)                 | ..                     |
| Unsure                                                                         | 5 (2.8)                              | 13 (72.2)                | 0.04 (0.01 to 0.12)*** |
| Unlikely                                                                       | 0 (0.0)                              | 14 (100.0)               | 0 (..)                 |
| <b>Belief about contracting COVID-19 within the next 12 months<sup>c</sup></b> |                                      |                          |                        |
| Likely (reference)                                                             | 124 (86.7)                           | 19 (13.3)                | ..                     |
| Unlikely                                                                       | 70 (76.9)                            | 21 (23.1)                | 0.49 (0.24 to 1.02)    |
| Don't know                                                                     | 39 (83.0)                            | 8 (17.0)                 | 0.67 (0.26 to 1.74)    |
|                                                                                | MS – M (SD)                          |                          |                        |
|                                                                                | Vaccinated <sup>a</sup><br>(n = 233) | Unvaccinated<br>(n = 48) | OR (95% CI)            |
| Oxford COVID-19 Vaccine Hesitancy Summary Scale                                | 9.1 (2.6)                            | 19.0 (8.9)               | 0.68 (0.60 to 0.76)*** |
| OCVCCS Summary                                                                 | 26.1 (4.1)                           | 39.6 (12.7)              | 0.66 (0.52 to 0.83)*** |
| OCVCCS: Collective Importance Subscale                                         | 7.9 (1.8)                            | 12.5 (5.2)               | 0.56 (0.43 to 0.72)*** |
| OCVCCS: Beliefs about COVID-19 Vaccine Subscale                                | 7.1 (1.3)                            | 9.1 (2.3)                | 0.49 (0.36 to 0.66)*** |
| OCVCCS: Speed of Vaccine Development Subscale                                  | 6.4 (1.9)                            | 10.0 (2.3)               | 0.37 (0.26 to 0.52)*** |
| OCVCCS: Side-Effects Subscale                                                  | 5.2 (1.5)                            | 8.4 (2.9)                | 0.53 (0.43 to 0.65)*** |
| DIVAS-6 Summary Scale                                                          | 14.7 (3.5)                           | 20.0 (4.7)               | 0.70 (0.62 to 0.80)*** |
| DIVAS-6 Disease Complacency Subscale                                           | 5.8 (2.9)                            | 7.6 (3.6)                | 0.82 (0.74 to 0.91)*** |
| DIVAS-6 Vaccine Vulnerability Subscale                                         | 9.0 (3.2)                            | 12.4 (2.7)               | 0.68 (0.58 to 0.79)*** |

\*p<0.05; \*\*p<.01; \*\*\*p<.001 for logistic regression models adjusted for covariates. Days since study commencement, age, and time since MS diagnosis were adjusted for all models.

<sup>a</sup> Vaccinated status was defined as receiving at least one COVID-19 vaccine dose.

<sup>b</sup> Vaccination intent were categorised as: Likely, Have or definitely/probably; Unsure, May or may not or possibly/don't know; Unlikely, Probably not or definitely not.

<sup>c</sup> Belief about contracting COVID-19 within the next 12 months were categorised as: Likely, Definitely or probably/possibly; Unlikely, Probably not or Definitely Not; Don't know.

Abbreviations: MS, multiple sclerosis; OR, odds ratio; OCVCCS, Oxford COVID-19 Vaccine Confidence and Complacency Scale; DIVAS-6, Disease Influenced Vaccine Acceptance Scale-6; 95% CI, 95% confidence interval.



**Table S4.** Linear regression predicting the Oxford COVID-19 Confidence and Complacency Scale – summary and subscales' scores using socio-demographic and clinical factors.

|                                                          | Step 1              | Step 2              |                       |              |         |
|----------------------------------------------------------|---------------------|---------------------|-----------------------|--------------|---------|
| Category (reference, n)                                  | Adj. R <sup>2</sup> | Adj. R <sup>2</sup> | Δ Adj. R <sup>2</sup> | B (SE)       | p-value |
| <i>Summary scale score</i>                               |                     |                     |                       |              |         |
| Age (n = 163)                                            | 0.005               | 0.049               | 0.044                 | -0.13 (0.04) | 0.004   |
| Location (Metropolitan, n = 163)                         | 0.005               | 0.036               | 0.031                 |              |         |
| Regional/rural                                           |                     |                     |                       | 16.29 (6.54) | 0.01    |
| Time since diagnosis (>10 years, n=163)                  | 0.005               | 0.068               | 0.063                 |              |         |
| <1 year                                                  |                     |                     |                       | 0.11 (2.71)  | 0.97    |
| 1 – 5 years                                              |                     |                     |                       | 5.08 (1.40)  | <0.001  |
| 5.1 – 10 years                                           |                     |                     |                       | 1.39 (1.48)  | 0.35    |
| MS control over the past 6 months (Yes, n = 163)         | 0.005               | 0.018               | 0.013                 |              |         |
| No                                                       |                     |                     |                       | 4.31 (2.18)  | 0.05    |
| Don't know                                               |                     |                     |                       | 1.16 (1.94)  | 0.55    |
| <i>Beliefs about COVID-19 and Vaccine subscale score</i> |                     |                     |                       |              |         |
| Age (n = 228)                                            | -0.002              | 0.012               | 0.014                 | -0.02 (0.01) | 0.04    |
| Time since diagnosis (>10 years, n = 228)                | -0.002              | 0.037               | 0.039                 |              |         |
| <1 year                                                  |                     |                     |                       | -0.26 (0.56) | 0.64    |
| 1 – 5 years                                              |                     |                     |                       | 0.77 (0.27)  | 0.004   |
| 5.1 – 10 years                                           |                     |                     |                       | 0.70 (0.29)  | 0.02    |
| <i>Side-Effects subscale score</i>                       |                     |                     |                       |              |         |
| Age (n = 247)                                            | 0.002               | 0.032               | 0.030                 | -0.03 (0.01) | 0.004   |
| Time since diagnosis (>10 years, n = 247)                | 0.002               | 0.029               | 0.027                 |              |         |
| <1 year                                                  |                     |                     |                       | -0.51 (0.74) | 0.49    |
| 1 – 5 years                                              |                     |                     |                       | 0.92 (0.33)  | 0.01    |
| 5.1 – 10 years                                           |                     |                     |                       | 0.40 (0.35)  | 0.25    |
| MS control over the past 6 months (Yes, n = 247)         | 0.002               | 0.012               | 0.010                 |              |         |
| No                                                       |                     |                     |                       | 0.88 (0.50)  | 0.08    |
| Don't know                                               |                     |                     |                       | 0.55 (0.45)  | 0.22    |
| <i>Collective Importance subscale score</i>              |                     |                     |                       |              |         |
| Location (Metropolitan, n = 226)                         | 0.005               | 0.037               | 0.032                 |              |         |
| Regional/rural                                           |                     |                     |                       | 6.39 (2.22)  | <0.001  |
| Current MS treatment (Yes, n = 226)                      | 0.005               | 0.003               | -0.002                |              |         |
| No                                                       |                     |                     |                       | 0.31 (0.48)  | 0.52    |
| MS control over the past 6 months (Yes, n = 226)         | 0.005               | 0.007               | 0.002                 |              |         |
| No                                                       |                     |                     |                       | 1.08 (0.69)  | 0.12    |
| Don't know                                               |                     |                     |                       | 0.04 (0.64)  | 0.95    |
| <i>Speed of Vaccine Development subscale score</i>       |                     |                     |                       |              |         |
| Age (n = 222)                                            | 0.028               | 0.038               | 0.010                 | -0.02 (0.01) | 0.08    |
| Location (Metropolitan, n = 222)                         | 0.028               | 0.049               | 0.021                 |              |         |
| Regional/rural                                           |                     |                     |                       | 4.51 (1.86)  | 0.02    |

**Notes:** Step 1, time since study commencement is the only predictor variable entered into the model; Step 2, the socio-demographic/clinical factor is the predictor variable entered into the model. Abbreviations: Adj. R<sup>2</sup>, Adjusted R<sup>2</sup>; B(SE), unstandardized coefficient (standard error).

**Table S5.** Hierarchical multivariable regression analysis of the Oxford COVID-19 Vaccine Hesitancy Scale score (n = 261).

| Step and variable (reference)              | Adj. R <sup>2</sup> | ΔAdj. R <sup>2</sup> | B (SE)       | p-value | sr    |
|--------------------------------------------|---------------------|----------------------|--------------|---------|-------|
| Step 1                                     | 0.043               | 0.043                |              |         |       |
| <b>Time since study commencement</b>       |                     |                      | 0.12 (0.04)  | <0.001  | 0.22  |
| Step 2                                     | 0.086               | 0.043                |              |         |       |
| <b>Gender (Male)</b>                       |                     |                      |              |         |       |
| Female                                     |                     |                      | 2.00 (0.77)  | 0.01    | 0.16  |
| <b>Age</b>                                 |                     |                      | -0.06 (0.03) | 0.01    | -0.15 |
| Step 3                                     | 0.085               | -0.001               |              |         |       |
| <b>Time since diagnosis (&gt;10 years)</b> |                     |                      |              |         |       |
| <1 year                                    |                     |                      | -1.26 (1.94) | 0.52    | -0.04 |
| 1 – 5 years                                |                     |                      | 1.00 (0.87)  | 0.25    | 0.07  |
| 5.1 – 10 years                             |                     |                      | 0.56 (0.86)  | 0.52    | 0.04  |

**Notes:** Variables entered into the model at each step: Step 1, time since study commencement; Step 2, gender and age; Step 3, time since diagnosis. Variable categories excluded: Other/Don't Know (gender). Abbreviations: Adj. R<sup>2</sup>, Adjusted R<sup>2</sup>; B(SE), unstandardized coefficient (standard error); sr, semipartial correlation coefficient.

**Table S6.** Hierarchical multivariable regression predicting the Oxford COVID-19 Confidence and Complacency Scale score (n = 163).

| Step and variable (reference)              | Adj. R <sup>2</sup> | ΔAdj. R <sup>2</sup> | B (SE)       | p-value | sr    |
|--------------------------------------------|---------------------|----------------------|--------------|---------|-------|
| Step 1                                     | 0.005               | 0.005                |              |         |       |
| <b>Time since study commencement</b>       |                     |                      | 0.09 (0.06)  | 0.18    | 0.11  |
| Step 2                                     | 0.069               | 0.064                |              |         |       |
| <b>Age</b>                                 |                     |                      | -0.11 (0.05) | 0.01    | -0.20 |
| <b>Location (Metropolitan)</b>             |                     |                      |              |         |       |
| Regional/rural                             |                     |                      | 13.56 (6.51) | 0.04    | 0.16  |
| Step 3                                     | 0.102               | 0.033                |              |         |       |
| <b>Time since diagnosis (&gt;10 years)</b> |                     |                      |              |         |       |
| <1 year                                    |                     |                      | -2.23 (2.80) | 0.43    | -0.06 |
| 1 – 5 years                                |                     |                      | 3.65 (1.47)  | 0.01    | 0.19  |
| 5.1 – 10 years                             |                     |                      | 0.82 (1.47)  | 0.58    | 0.04  |

**Notes:** Variables entered into the model at each step: Step 1, time since study commencement; Step 2, age and location; Step 3, time since diagnosis. Abbreviations: Adj. R<sup>2</sup>, Adjusted R<sup>2</sup>; B(SE), unstandardized coefficient (standard error); sr, semipartial correlation coefficient.

**Table S7.** Hierarchical multivariable regression predicting the Oxford COVID-19 Confidence and Complacency Scale – Beliefs about COVID-19 and Vaccine subscale score (n = 228).

| Step and variable (reference)              | Adj. R <sup>2</sup> | ΔAdj. R <sup>2</sup> | B (SE)       | p-value | sr    |
|--------------------------------------------|---------------------|----------------------|--------------|---------|-------|
| Step 1                                     | -0.002              | -0.002               |              |         |       |
| <b>Time since study commencement</b>       |                     |                      | 0.01 (0.01)  | 0.44    | 0.05  |
| Step 2                                     | 0.012               | 0.014                |              |         |       |
| <b>Age</b>                                 |                     |                      | -0.02 (0.01) | 0.04    | -0.14 |
| Step 3                                     | 0.041               | 0.029                |              |         |       |
| <b>Time since diagnosis (&gt;10 years)</b> |                     |                      |              |         |       |
| <1 year                                    |                     |                      | -0.49 (0.58) | 0.40    | -0.06 |
| 1 – 5 years                                |                     |                      | 0.62 (0.29)  | 0.03    | 0.14  |
| 5.1 – 10 years                             |                     |                      | 0.63 (0.30)  | 0.03    | 0.14  |

**Notes:** Variables entered into the model at each step: Step 1, time since study commencement; Step 2, age; Step 3, time since diagnosis. Abbreviations: Adj. R<sup>2</sup>, Adjusted R<sup>2</sup>; B(SE), unstandardized coefficient (standard error); sr, semipartial correlation coefficient.

**Table S8.** Hierarchical multivariable regression predicting the Oxford COVID-19 Confidence and Complacency Scale – Side-Effects subscale score (n = 247).

| Step and variable (reference)              | Adj. R <sup>2</sup> | ΔAdj. R <sup>2</sup> | B (SE)       | p-value | sr    |
|--------------------------------------------|---------------------|----------------------|--------------|---------|-------|
| Step 1                                     | 0.002               | 0.002                |              |         |       |
| <b>Time since study commencement</b>       |                     |                      | 0.02 (0.02)  | 0.21    | 0.08  |
| Step 2                                     | 0.032               | 0.030                |              |         |       |
| <b>Age</b>                                 |                     |                      | -0.03 (0.01) | 0.004   | -0.18 |
| Step 3                                     | 0.046               | 0.016                |              |         |       |
| <b>Time since diagnosis (&gt;10 years)</b> |                     |                      |              |         |       |
| <1 year                                    |                     |                      | -1.01 (0.76) | 0.18    | -0.08 |
| 1 – 5 years                                |                     |                      | 0.61 (0.35)  | 0.08    | 0.11  |
| 5.1 – 10 years                             |                     |                      | 0.27 (0.35)  | 0.45    | 0.05  |

**Notes:** Variables entered into the model at each step: Step 1, time since study commencement; Step 2, age; Step 3, time since diagnosis. Abbreviations: Adj. R<sup>2</sup>, Adjusted R<sup>2</sup>; B(SE), unstandardized coefficient (standard error); sr, semipartial correlation coefficient.

**Table S9.** Linear regression predicting the DIVAS-6 summary scale and subscales' scores using socio-demographic and clinical factors.

|                                                                            | Step 1              | Step 2              |                       |              |         |
|----------------------------------------------------------------------------|---------------------|---------------------|-----------------------|--------------|---------|
| Category (reference, n)                                                    | Adj. R <sup>2</sup> | Adj. R <sup>2</sup> | Δ Adj. R <sup>2</sup> | B (SE)       | p-value |
| <b>Summary scale score</b>                                                 |                     |                     |                       |              |         |
| Age (n = 254)                                                              | 0.008               | 0.020               | 0.012                 | -0.04 (0.02) | 0.04    |
| English as first language (Yes, n = 254)                                   | 0.008               | 0.037               | 0.029                 |              |         |
| No                                                                         |                     |                     |                       | 2.68 (0.92)  | 0.004   |
| Current MS treatment (Yes, n = 254)                                        | 0.008               | 0.006               | -0.002                |              |         |
| No                                                                         |                     |                     |                       | 0.47 (0.66)  | 0.47    |
| <b>Vaccine Vulnerability subscale score</b>                                |                     |                     |                       |              |         |
| Gender (Male, n = 259)                                                     | 0.006               | 0.026               | 0.020                 |              |         |
| Female                                                                     |                     |                     |                       | 1.20 (0.48)  | 0.01    |
| Age (n = 262)                                                              | 0.006               | 0.037               | 0.031                 | -0.05 (0.02) | 0.002   |
| Time since diagnosis (>10 years, n = 262)                                  | 0.006               | 0.032               | 0.026                 |              |         |
| <1 year                                                                    |                     |                     |                       | -0.78 (1.21) | 0.52    |
| 1 – 5 years                                                                |                     |                     |                       | 1.36 (0.50)  | 0.01    |
| 5.1 – 10 years                                                             |                     |                     |                       | 1.07 (0.54)  | 0.051   |
| MS control over the past 6 months (Yes, n = 262)                           | 0.006               | 0.022               | 0.016                 |              |         |
| No                                                                         |                     |                     |                       | 1.67 (0.69)  | 0.02    |
| Don't know                                                                 |                     |                     |                       | 0.75 (0.72)  | 0.30    |
| MS impact on daily activities in the past four weeks (Not at all, n = 262) | 0.006               | 0.063               | 0.057                 |              |         |
| All of the time                                                            |                     |                     |                       | 2.00 (0.66)  | <0.001  |
| Most of the time                                                           |                     |                     |                       | 1.04 (0.70)  | 0.14    |
| Some of the time                                                           |                     |                     |                       | 2.19 (0.56)  | <0.001  |
| Not very often                                                             |                     |                     |                       | 2.16 (0.64)  | <0.001  |
| <b>Disease Complacency subscale score</b>                                  |                     |                     |                       |              |         |
| MS Type (Relapsing-remitting MS, n = 247)                                  | 0.00                | 0.020               | 0.020                 |              |         |
| Primary progressive MS                                                     |                     |                     |                       | 1.53 (0.64)  | 0.02    |
| Secondary progressive MS                                                   |                     |                     |                       | 0.87 (0.61)  | 0.15    |

**Notes:** Step 1, time since study commencement is the only predictor variable entered into the model; Step 2, the socio-demographic/clinical factor is the predictor variable entered into the model. These variables were excluded due to <5 responses: non-binary/other gender. Abbreviations: Adj. R<sup>2</sup>, Adjusted R<sup>2</sup>; B(SE), unstandardized coefficient (standard error).

**Table S10.** Hierarchical multivariable regression predicting the DIVAS-6 Summary score (n = 247).

| Step and variable (reference)          | Adj. R <sup>2</sup> | ΔAdj. R <sup>2</sup> | B (SE)       | p-value | sr    |
|----------------------------------------|---------------------|----------------------|--------------|---------|-------|
| Step 1                                 | 0.008               | 0.008                |              |         |       |
| <b>Time since study commencement</b>   |                     |                      | 0.05 (0.03)  | 0.08    | 0.11  |
| Step 2                                 | 0.046               | 0.038                |              |         |       |
| <b>Age</b>                             |                     |                      | -0.04 (0.02) | 0.06    | -0.12 |
| <b>English as first language (Yes)</b> |                     |                      |              |         |       |
| No                                     |                     |                      | 2.56 (0.92)  | 0.01    | 0.17  |

**Notes:** Variables entered into the model at each step: Step 1, time since study commencement; Step 2, age and English as first language. Adj. R<sup>2</sup>, Adjusted R<sup>2</sup>; B(SE), unstandardized coefficient (standard error); sr, semipartial correlation coefficient.

**Table S11.** Hierarchical multivariable regression predicting the DIVAS-6 Vaccine Vulnerability subscale score with time since diagnosis and MS control, controlling for gender and age (n = 259).

| Step and variable (reference)                  | Adj. R <sup>2</sup> | ΔAdj. R <sup>2</sup> | B (SE)       | p-value | sr    |
|------------------------------------------------|---------------------|----------------------|--------------|---------|-------|
| Step 1                                         | 0.006               | 0.006                |              |         |       |
| <b>Time since study commencement</b>           |                     |                      | 0.04 (0.02)  | 0.11    | 0.10  |
| Step 2                                         | 0.058               | 0.052                |              |         |       |
| <b>Gender (Male)</b>                           |                     |                      |              |         |       |
| Female                                         |                     |                      | 1.04 (0.48)  | 0.03    | 0.13  |
| <b>Age</b>                                     |                     |                      | -0.05 (0.02) | 0.002   | -0.19 |
| Step 3                                         | 0.094               | 0.036                |              |         |       |
| <b>Time since diagnosis (&gt;10 years)</b>     |                     |                      |              |         |       |
| <1 year                                        |                     |                      | -1.67 (1.21) | 0.17    | -0.08 |
| 1 – 5 years                                    |                     |                      | 0.87 (0.53)  | 0.10    | 0.10  |
| 5.1 – 10 years                                 |                     |                      | 0.90 (0.54)  | 0.09    | 0.10  |
| <b>MS control over the past 6 months (Yes)</b> |                     |                      |              |         |       |
| No                                             |                     |                      | 1.77 (0.67)  | 0.01    | 0.16  |
| Don't know                                     |                     |                      | 1.04 (0.71)  | 0.14    | 0.09  |

**Notes:** Variables entered into the model at each step: Step 1, time since study commencement; Step 2, gender and age; Step 3, time since diagnosis and MS control over the past 6 months. Variable categories excluded: Other/Don't Know (gender). Adj. R<sup>2</sup>, Adjusted R<sup>2</sup>; B(SE), unstandardized coefficient (standard error); sr, semipartial correlation coefficient.



**Table S12.** Hierarchical multivariable regression predicting the DIVAS-6 Vaccine Vulnerability subscale score with MS impact on daily activities in the past four weeks, controlling for gender and age (n = 259).

| Step and variable (reference)                                            | Adj. R <sup>2</sup> | ΔAdj. R <sup>2</sup> | B (SE)       | p-value | sr    |
|--------------------------------------------------------------------------|---------------------|----------------------|--------------|---------|-------|
| Step 1                                                                   | 0.006               | 0.006                |              |         |       |
| <b>Time since study commencement</b>                                     |                     |                      | 0.04 (0.02)  | 0.11    | 0.10  |
| Step 2                                                                   | 0.058               | 0.052                |              |         |       |
| <b>Gender (Male)</b>                                                     |                     |                      |              |         |       |
| Female                                                                   |                     |                      | 1.04 (0.48)  | 0.03    | 0.13  |
| <b>Age</b>                                                               |                     |                      | -0.05 (0.02) | 0.002   | -0.19 |
| Step 3                                                                   | 0.134               | 0.076                |              |         |       |
| <b>MS impact on daily activities in the past four weeks (Not at all)</b> |                     |                      |              |         |       |
| All of the time                                                          |                     |                      | 2.54 (0.65)  | <0.001  | 0.23  |
| Most of the time                                                         |                     |                      | 2.28 (0.71)  | 0.002   | 0.19  |
| Some of the time                                                         |                     |                      | 2.40 (0.53)  | <0.001  | 0.26  |
| Not very often                                                           |                     |                      | 2.28 (0.61)  | <0.001  | 0.22  |

**Notes:** Variables entered into the model at each step: Step 1, time since study commencement; Step 2, gender and age; Step 3, MS impact on daily activities in the past four weeks. Variable categories excluded: Other/Don't Know (gender). Adj. R<sup>2</sup>, Adjusted R<sup>2</sup>; B(SE), unstandardized coefficient (standard error); sr, semipartial correlation coefficient.

**Table S13.** Receiver-operating analysis, showing the discriminative ability of each scale and subscale to predict vaccination status.

| Scale                                          | Area under the curve | SE   | p-value | 95% CI Lower | 95% CI Upper |
|------------------------------------------------|----------------------|------|---------|--------------|--------------|
| Oxford COVID-19 Vaccine Hesitancy Scale        | 0.87                 | 0.04 | <0.001  | 0.80         | 0.94         |
| OCVCCS Summary                                 | 0.89                 | 0.03 | <0.001  | 0.83         | 0.96         |
| OCVCCS Collective Importance Subscale          | 0.81                 | 0.05 | <0.001  | 0.71         | 0.90         |
| OCVCCS Beliefs about COVID-19 Vaccine Subscale | 0.77                 | 0.05 | <0.001  | 0.69         | 0.86         |
| OCVCCS Speed of Vaccine Development Subscale   | 0.88                 | 0.03 | <0.001  | 0.82         | 0.94         |
| OCVCCS Side-Effects Subscale                   | 0.85                 | 0.04 | <0.001  | 0.78         | 0.92         |
| DIVAS-6 Disease Complacency                    | 0.66                 | 0.05 | <0.001  | 0.57         | 0.75         |
| DIVAS-6 Vaccine Vulnerability                  | 0.80                 | 0.04 | <0.001  | 0.73         | 0.88         |
| DIVAS-6 Summary                                | 0.81                 | 0.04 | <0.001  | 0.74         | 0.89         |

**Notes:** OCVCCS, Oxford COVID-19 Vaccine Confidence and Complacency Scale; DIVAS-6, Disease Influenced COVID-19 Vaccine Acceptance Scale-Six; SE, Standard error.

**Table S14.** Sensitivity and specificity results for different cut off scores for the Oxford COVID-19 Vaccine Hesitancy Scale summary score.

| Cut-off Scores $\geq$ | Sensitivity | Specificity | Youden's Index |
|-----------------------|-------------|-------------|----------------|
| 6                     | 1.00        | 0.00        | 0.00           |
| 8                     | 0.95        | 0.43        | 0.38           |
| 9                     | 0.87        | 0.57        | 0.43           |
| 10                    | 0.87        | 0.67        | 0.54           |
| 11                    | 0.82        | 0.75        | 0.57           |
| 12                    | 0.74        | 0.84        | 0.58           |
| 13                    | 0.71        | 0.88        | 0.59           |
| 14                    | 0.66        | 0.92        | 0.57           |
| 15                    | 0.61        | 0.94        | 0.54           |
| 16                    | 0.55        | 0.98        | 0.53           |
| 17                    | 0.50        | 0.99        | 0.49           |
| 18                    | 0.45        | 0.99        | 0.44           |
| 19                    | 0.42        | 1.00        | 0.42           |
| 21                    | 0.40        | 1.00        | 0.40           |
| 23                    | 0.37        | 1.00        | 0.37           |
| 24                    | 0.34        | 1.00        | 0.34           |
| 25                    | 0.32        | 1.00        | 0.32           |
| 26                    | 0.26        | 1.00        | 0.26           |
| 27                    | 0.24        | 1.00        | 0.24           |
| 28                    | 0.21        | 1.00        | 0.21           |
| 29                    | 0.18        | 1.00        | 0.18           |
| 31                    | 0.16        | 1.00        | 0.16           |
| 34                    | 0.05        | 1.00        | 0.05           |
| 35                    | 0.03        | 1.00        | 0.03           |
| 36                    | 0.00        | 1.00        | 0.00           |

**Table S15.** Sensitivity and specificity results for different cut off scores for the Oxford COVID-19 Vaccine Confidence and Complacency Scale summary score.

| Cut-off Scores $\geq$ | Sensitivity | Specificity | Youden's Index |
|-----------------------|-------------|-------------|----------------|
| 14                    | 1.00        | 0.00        | 0.00           |
| 17                    | 1.00        | 0.01        | 0.01           |
| 19                    | 1.00        | 0.02        | 0.02           |
| 20                    | 1.00        | 0.06        | 0.06           |
| 21                    | 1.00        | 0.12        | 0.12           |
| 22                    | 1.00        | 0.15        | 0.15           |
| 23                    | 1.00        | 0.18        | 0.18           |
| 24                    | 1.00        | 0.25        | 0.25           |
| 25                    | 1.00        | 0.34        | 0.34           |
| 26                    | 1.00        | 0.39        | 0.39           |
| 27                    | 1.00        | 0.54        | 0.54           |
| 28                    | 1.00        | 0.64        | 0.64           |
| 29                    | 0.80        | 0.70        | 0.50           |
| 30                    | 0.70        | 0.78        | 0.48           |
| 31                    | 0.70        | 0.85        | 0.55           |
| 32                    | 0.65        | 0.92        | 0.57           |
| 33                    | 0.55        | 0.95        | 0.50           |
| 35                    | 0.50        | 0.99        | 0.49           |
| 37                    | 0.45        | 0.99        | 0.44           |
| 38                    | 0.35        | 0.99        | 0.34           |
| 39                    | 0.35        | 1.00        | 0.35           |
| 45                    | 0.30        | 1.00        | 0.30           |
| 52                    | 0.25        | 1.00        | 0.25           |
| 55                    | 0.20        | 1.00        | 0.20           |
| 57                    | 0.15        | 1.00        | 0.15           |
| 59                    | 0.10        | 1.00        | 0.10           |
| 64                    | 0.05        | 1.00        | 0.05           |
| 68                    | 0.00        | 1.00        | 0.00           |

**Table S16.** Sensitivity and specificity results for different cut off scores for the Oxford COVID-19 Vaccine Confidence and Complacency Scale – Collective Importance subscale score.

| <b>Cut-off Scores <math>\geq</math></b> | <b>Sensitivity</b> | <b>Specificity</b> | <b>Youden's Index</b> |
|-----------------------------------------|--------------------|--------------------|-----------------------|
| 4                                       | 1.00               | 0.00               | 0.00                  |
| 6                                       | 1.00               | 0.08               | 0.08                  |
| 7                                       | 0.97               | 0.22               | 0.18                  |
| 8                                       | 0.86               | 0.47               | 0.33                  |
| 9                                       | 0.76               | 0.68               | 0.43                  |
| 10                                      | 0.66               | 0.83               | 0.48                  |
| 11                                      | 0.48               | 0.93               | 0.42                  |
| 12                                      | 0.45               | 0.98               | 0.42                  |
| 13                                      | 0.35               | 0.98               | 0.32                  |
| 14                                      | 0.31               | 1.00               | 0.31                  |
| 16                                      | 0.28               | 1.00               | 0.28                  |
| 18                                      | 0.24               | 1.00               | 0.24                  |
| 20                                      | 0.17               | 1.00               | 0.17                  |
| 21                                      | 0.10               | 1.00               | 0.10                  |
| 23                                      | 0.03               | 1.00               | 0.03                  |
| 25                                      | 0.00               | 1.00               | 0.00                  |

**Table S17.** Sensitivity and specificity results for different cut off scores for the Oxford COVID-19 Vaccine Confidence and Complacency Scale – Beliefs about COVID-19 subscale score.

| <b>Cut-off Scores <math>\geq</math></b> | <b>Sensitivity</b> | <b>Specificity</b> | <b>Youden's Index</b> |
|-----------------------------------------|--------------------|--------------------|-----------------------|
| 2                                       | 1.00               | 0.00               | 0.00                  |
| 4                                       | 1.00               | 0.02               | 0.02                  |
| 5                                       | 1.00               | 0.02               | 0.02                  |
| 6                                       | 1.00               | 0.09               | 0.09                  |
| 7                                       | 0.92               | 0.32               | 0.24                  |
| 8                                       | 0.73               | 0.64               | 0.37                  |
| 9                                       | 0.51               | 0.90               | 0.41                  |
| 10                                      | 0.35               | 0.96               | 0.31                  |
| 11                                      | 0.19               | 1.00               | 0.19                  |
| 12                                      | 0.16               | 1.00               | 0.16                  |
| 13                                      | 0.11               | 1.00               | 0.11                  |
| 14                                      | 0.08               | 1.00               | 0.08                  |
| 15                                      | 0.03               | 1.00               | 0.03                  |
| 16                                      | 0.00               | 1.00               | 0.00                  |

**Table S18.** Sensitivity and specificity results for different cut off scores for the Oxford COVID-19 Vaccine Confidence and Complacency Scale – Speed of Vaccine Development subscale score.

| Cut-off Scores $\geq$ | Sensitivity | Specificity | Youden's Index |
|-----------------------|-------------|-------------|----------------|
| 2                     | 1.00        | 0.00        | 0.00           |
| 4                     | 1.00        | 0.11        | 0.11           |
| 5                     | 1.00        | 0.17        | 0.17           |
| 6                     | 1.00        | 0.31        | 0.31           |
| 7                     | 0.97        | 0.52        | 0.50           |
| 8                     | 0.76        | 0.74        | 0.49           |
| 9                     | 0.70        | 0.84        | 0.54           |
| 10                    | 0.57        | 0.98        | 0.55           |
| 11                    | 0.51        | 0.98        | 0.50           |
| 12                    | 0.24        | 1.00        | 0.24           |
| 13                    | 0.16        | 1.00        | 0.16           |
| 14                    | 0.03        | 1.00        | 0.03           |
| 15                    | 0.00        | 1.00        | 0.00           |

**Table S19.** Sensitivity and specificity results for different cut off scores for the Oxford COVID-19 Vaccine Confidence and Complacency Scale – Side-Effects subscale score.

| <b>Cut-off Scores ≥</b> | <b>Sensitivity</b> | <b>Specificity</b> | <b>Youden's Index</b> |
|-------------------------|--------------------|--------------------|-----------------------|
| 2                       | 1.00               | 0.00               | 0.00                  |
| 4                       | 1.00               | 0.03               | 0.03                  |
| 5                       | 0.95               | 0.36               | 0.31                  |
| 6                       | 0.87               | 0.68               | 0.55                  |
| 7                       | 0.71               | 0.85               | 0.56                  |
| 8                       | 0.50               | 0.92               | 0.42                  |
| 9                       | 0.37               | 0.95               | 0.32                  |
| 10                      | 0.29               | 0.98               | 0.27                  |
| 11                      | 0.24               | 1.00               | 0.23                  |
| 13                      | 0.13               | 1.00               | 0.13                  |
| 14                      | 0.05               | 1.00               | 0.05                  |
| 15                      | 0.03               | 1.00               | 0.03                  |
| 16                      | 0.00               | 1.00               | 0.00                  |



**Table S20.** Sensitivity and specificity results for different cut off scores for the DIVAS-6 – Disease Complacency subscale score.

| Cut-off Scores $\geq$ | Sensitivity | Specificity | Youden's Index |
|-----------------------|-------------|-------------|----------------|
| 2                     | 1.00        | 0.00        | 0.00           |
| 4                     | 0.82        | 0.28        | 0.10           |
| 5                     | 0.80        | 0.41        | 0.21           |
| 6                     | 0.73        | 0.58        | 0.31           |
| 7                     | 0.57        | 0.68        | 0.25           |
| 8                     | 0.43        | 0.79        | 0.22           |
| 9                     | 0.27        | 0.85        | 0.12           |
| 10                    | 0.27        | 0.88        | 0.16           |
| 11                    | 0.23        | 0.91        | 0.13           |
| 12                    | 0.21        | 0.95        | 0.16           |
| 13                    | 0.14        | 0.96        | 0.10           |
| 14                    | 0.07        | 0.98        | 0.05           |
| 15                    | 0.05        | 0.98        | 0.02           |
| 16                    | 0.00        | 1.00        | 0.00           |

**Table S21.** Sensitivity and specificity results for different cut off scores for the DIVAS-6 – Vaccine Vulnerability subscale score.

| <b>Cut-off Scores <math>\geq</math></b> | <b>Sensitivity</b> | <b>Specificity</b> | <b>Youden's Index</b> |
|-----------------------------------------|--------------------|--------------------|-----------------------|
| 2                                       | 1.00               | 0.00               | 0.00                  |
| 4                                       | 0.98               | 0.08               | 0.05                  |
| 5                                       | 0.98               | 0.13               | 0.11                  |
| 6                                       | 0.98               | 0.17               | 0.14                  |
| 7                                       | 0.96               | 0.22               | 0.17                  |
| 8                                       | 0.96               | 0.30               | 0.26                  |
| 9                                       | 0.91               | 0.37               | 0.28                  |
| 10                                      | 0.86               | 0.56               | 0.42                  |
| 11                                      | 0.84               | 0.67               | 0.52                  |
| 12                                      | 0.73               | 0.77               | 0.50                  |
| 13                                      | 0.55               | 0.87               | 0.42                  |
| 14                                      | 0.39               | 0.93               | 0.31                  |
| 15                                      | 0.30               | 0.95               | 0.25                  |
| 16                                      | 0.00               | 1.00               | 0.00                  |

**Table S22.** Sensitivity and specificity results for different cut off scores for the DIVAS-6 Summary Score.

| <b>Cut-off Scores <math>\geq</math></b> | <b>Sensitivity</b> | <b>Specificity</b> | <b>Youden's Index</b> |
|-----------------------------------------|--------------------|--------------------|-----------------------|
| 5                                       | 1.00               | 0.00               | 0.00                  |
| 7                                       | 1.00               | 0.01               | 0.01                  |
| 8                                       | 1.00               | 0.03               | 0.03                  |
| 9                                       | 1.00               | 0.05               | 0.05                  |
| 10                                      | 1.00               | 0.08               | 0.08                  |
| 11                                      | 1.00               | 0.12               | 0.12                  |
| 12                                      | 0.98               | 0.16               | 0.14                  |
| 13                                      | 0.98               | 0.26               | 0.23                  |
| 14                                      | 0.95               | 0.36               | 0.31                  |
| 15                                      | 0.90               | 0.46               | 0.36                  |
| 16                                      | 0.85               | 0.55               | 0.41                  |
| 17                                      | 0.76               | 0.71               | 0.47                  |
| 18                                      | 0.66               | 0.77               | 0.42                  |
| 19                                      | 0.54               | 0.90               | 0.43                  |
| 20                                      | 0.51               | 0.93               | 0.44                  |
| 21                                      | 0.37               | 0.96               | 0.32                  |
| 22                                      | 0.32               | 0.98               | 0.29                  |
| 23                                      | 0.27               | 0.99               | 0.25                  |
| 24                                      | 0.22               | 1.00               | 0.22                  |
| 25                                      | 0.20               | 1.00               | 0.19                  |
| 26                                      | 0.17               | 1.00               | 0.17                  |
| 27                                      | 0.15               | 1.00               | 0.15                  |
| 28                                      | 0.10               | 1.00               | 0.10                  |
| 29                                      | 0.05               | 1.00               | 0.05                  |
| 30                                      | 0.02               | 1.00               | 0.02                  |
| 31                                      | 0.00               | 1.00               | 0.00                  |

**Table S23.** Correlation matrix between significant variables from the univariable regression analyses, using Spearman's Rho.

|                               |                         | Age<br>(Continuous) | Location | Gender  | Annual<br>Household<br>Income | English as<br>first<br>language | MS Type | Time since<br>MS diagnosis | MS control<br>over past 6<br>months | MS affect<br>daily<br>activities in<br>the past four<br>weeks |
|-------------------------------|-------------------------|---------------------|----------|---------|-------------------------------|---------------------------------|---------|----------------------------|-------------------------------------|---------------------------------------------------------------|
| Age (Continuous)              | Correlation Coefficient | 1.000               | -.162**  | -.151*  | -.068                         | -.068                           | .322**  | .437**                     | -.005                               | -.227**                                                       |
|                               | Sig. (2-tailed)         | .                   | .006     | .011    | .254                          | .259                            | <0.001  | <0.001                     | .930                                | <0.001                                                        |
|                               | N                       | 281                 | 281      | 281     | 281                           | 281                             | 281     | 281                        | 281                                 | 281                                                           |
| Location                      | Correlation Coefficient | -.162**             | 1.000    | .054    | -.003                         | -.128*                          | -.056   | -.260**                    | .071                                | -.024                                                         |
|                               | Sig. (2-tailed)         | .006                | .        | .363    | .954                          | .032                            | .348    | <0.001                     | .232                                | .684                                                          |
|                               | N                       | 281                 | 281      | 281     | 281                           | 281                             | 281     | 281                        | 281                                 | 281                                                           |
| Gender                        | Correlation Coefficient | -.151*              | .054     | 1.000   | .023                          | -.107                           | -.181** | -.092                      | .019                                | .115                                                          |
|                               | Sig. (2-tailed)         | .011                | .363     | .       | .703                          | .073                            | .002    | .124                       | .745                                | .055                                                          |
|                               | N                       | 281                 | 281      | 281     | 281                           | 281                             | 281     | 281                        | 281                                 | 281                                                           |
| Annual<br>Household<br>Income | Correlation Coefficient | -.068               | -.003    | .023    | 1.000                         | .017                            | .060    | -.004                      | -.033                               | .100                                                          |
|                               | Sig. (2-tailed)         | .254                | .954     | .703    | .                             | .772                            | .316    | .940                       | .582                                | .094                                                          |
|                               | N                       | 281                 | 281      | 281     | 281                           | 281                             | 281     | 281                        | 281                                 | 281                                                           |
| English as first<br>language  | Correlation Coefficient | -.068               | -.128*   | -.107   | .017                          | 1.000                           | .091    | -.098                      | .082                                | -.056                                                         |
|                               | Sig. (2-tailed)         | .259                | .032     | .073    | .772                          | .                               | .127    | .101                       | .168                                | .347                                                          |
|                               | N                       | 281                 | 281      | 281     | 281                           | 281                             | 281     | 281                        | 281                                 | 281                                                           |
| MS Type                       | Correlation Coefficient | .322**              | -.056    | -.181** | .060                          | .091                            | 1.000   | .116                       | .188**                              | -.331**                                                       |
|                               | Sig. (2-tailed)         | <0.001              | .348     | .002    | .316                          | .127                            | .       | .052                       | .002                                | <0.001                                                        |
|                               | N                       | 281                 | 281      | 281     | 281                           | 281                             | 281     | 281                        | 281                                 | 281                                                           |
| Time since MS<br>diagnosis    | Correlation Coefficient | .437**              | -.260**  | -.092   | -.004                         | -.098                           | .116    | 1.000                      | -.087                               | -.070                                                         |
|                               | Sig. (2-tailed)         | <0.001              | <0.001   | .124    | .940                          | .101                            | .052    | .                          | .146                                | .239                                                          |
|                               | N                       | 281                 | 281      | 281     | 281                           | 281                             | 281     | 281                        | 281                                 | 281                                                           |

|                                                                  |                                |         |       |      |       |       |         |       |         |         |
|------------------------------------------------------------------|--------------------------------|---------|-------|------|-------|-------|---------|-------|---------|---------|
| <b>MS control over<br/>past 6 months</b>                         | <b>Correlation Coefficient</b> | -.005   | .071  | .019 | -.033 | .082  | .188**  | -.087 | 1.000   | -.329** |
|                                                                  | <b>Sig. (2-tailed)</b>         | .930    | .232  | .745 | .582  | .168  | .002    | .146  | .       | <0.001  |
|                                                                  | <b>N</b>                       | 281     | 281   | 281  | 281   | 281   | 281     | 281   | 281     | 281     |
| <b>MS affect daily<br/>activities in the<br/>past four weeks</b> | <b>Correlation Coefficient</b> | -.227** | -.024 | .115 | .100  | -.056 | -.331** | -.070 | -.329** | 1.000   |
|                                                                  | <b>Sig. (2-tailed)</b>         | <0.001  | .684  | .055 | .094  | .347  | <0.001  | .239  | <0.001  | .       |
|                                                                  | <b>N</b>                       | 281     | 281   | 281  | 281   | 281   | 281     | 281   | 281     | 281     |

**Notes:** \*p<0.05; \*\*p<0.01.
